# Supplementary material for: Nanoparticles of unmodified titanium dioxide facilitate protein refolding
Source: Royal Society of Chemistry journal article supplement (doi:10.1039/b817306k), 2009-01-01
Supplement: b817306k.pdf [file b817306k.pdf]

## Supplementary information

# Nanoparticles of unmodified titanium dioxide facilitate protein refolding

Smita Raghava,<sup>a</sup> Pradeep K. Singh,<sup>a</sup> A. Ranga Rao,<sup>b†</sup> V. Dutta<sup>b</sup> and Munishwar N. Gupta<sup>\*a</sup>

<sup>a</sup> Chemistry Department, Indian Institute of Technology Delhi, Hauz Khas, New Delhi 110 016, India.

<sup>b</sup> Photovoltaic Laboratory, Centre for Energy Studies, Indian Institute of Technology Delhi, Hauz Khas, New Delhi 110 016, India.

<sup>†</sup> Present address: Applied Materials India Pvt. Ltd., ITPL, Bangalore-560066, India.

**Table S1.** The percentage of secondary structure elements of native proteins and thermally denatured proteins in the absence and presence of TiO<sub>2</sub> nanoparticles as estimated from far-UV CD spectra.

| Sample                                   | $\alpha$ -Helix | $\beta$ -Sheets | $\beta$ -Turn | Random coil |
|------------------------------------------|-----------------|-----------------|---------------|-------------|
| Lysozyme                                 | 31.20           | 19.10           | 17.20         | 32.50       |
| D-Lysozyme <sup>‡</sup>                  | 9.30            | 22.50           | 10.20         | 58.00       |
| D-Lysozyme-TiO <sub>2</sub>              | 26.70           | 24.60           | 14.60         | 34.10       |
| D-Lysozyme-TiO <sub>2</sub> - NaCl       | 31.00           | 18.60           | 16.80         | 33.60       |
| Subtilisin A                             | 34.20           | 20.75           | 23.04         | 22.01       |
| D- Subtilisin A                          | 8.80            | 23.91           | 18.50         | 51.21       |
| D- Subtilisin A -TiO <sub>2</sub>        | 28.90           | 24.80           | 20.21         | 26.09       |
| D- Subtilisin A -TiO <sub>2</sub> - NaCl | 33.80           | 21.20           | 23.80         | 21.20       |

<sup>‡</sup>Denatured Lysozyme

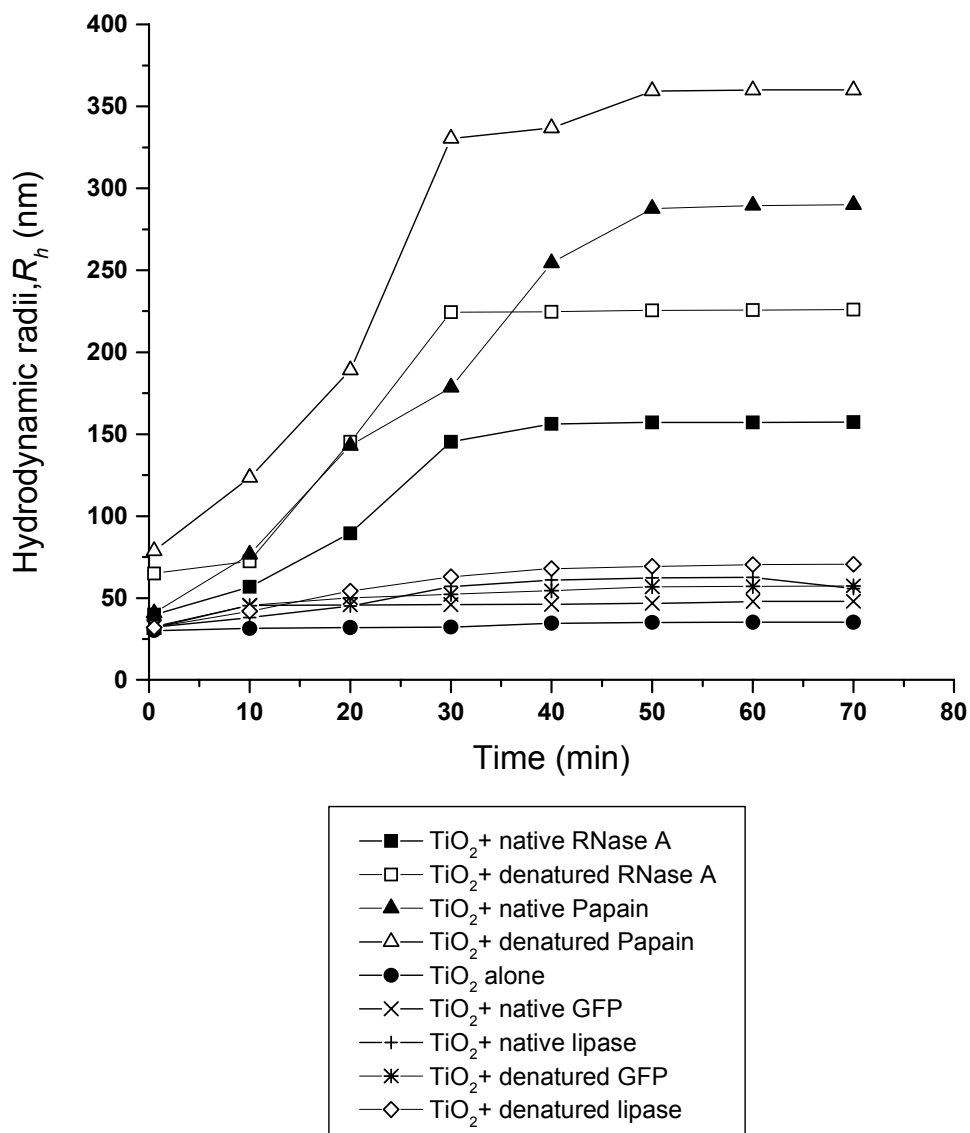

**Fig. S1** The size distribution of  $\text{TiO}_2$  particles and protein sample (both native and thermally denatured) during association by DLS after different time interval.
